# Supplementary material
Source: PubMed Central journal article supplement (PMC2665970)
Supplement: NIHMS86583-supplement-1_si_001.pdf [file NIHMS86583-supplement-1_si_001.pdf]

**Supporting Materials: Description of phosphate hydrolysis reactions with the Self-Consistent-Charge Density-Functional-Tight-Binding (SCC-DFTB) theory. 1. Parameterization**

<sup>1</sup>Yang Yang, <sup>1</sup>Haibo Yu, <sup>2</sup>Darrin York, <sup>3</sup>Marcus Elstner and <sup>1</sup>Qiang Cui

*<sup>1</sup>Department of Chemistry and Theoretical Chemistry Institute  
University of Wisconsin, Madison  
1101 University Avenue, Madison, WI 53706*

*<sup>2</sup>Department of Chemistry  
University of Minnesota  
207 Pleasant St. SE, Minneapolis, MN 55455*

*<sup>3</sup>Department of Physical and Theoretical Chemistry  
TU Braunschweig, Hans-Sommer-Strass 10  
D-38106 Braunschweig, Germany*

The following materials are included in the **Supporting Materials**.

The detailed energetics and dipole moment information regarding the performance of the second-order SCC-DFTB and optimized SCC-DFTBPR on model molecules in the QCRNA database are summarized in Table S1 and S2, respectively. The reference B3LYP results are from the QCRNA database website (<http://theory.chem.umn.edu/QCRNA/>).

The average binding energies between MMP in different chemical states along the dissociative pathway and nearby water molecules at different QM and QM/MM levels are summarized in Table S3. Encouragingly, the B3LYP and full SCC-DFTBPR results are very similar despite the large magnitude of total interaction energies. The SCC-DFTBPR/MM results, on the other hand, are substantially different from the full QM results if the standard Coulombic expression is used for the QM/MM interaction, regardless of the QM van der Waals parameters. Using the Klopman-Ohno formulation for the QM/MM interaction, by contrast, gives substantially closer agreement with the full QM calculations even without any attempt to optimize the relevant parameters (e.g., including the charge dependence of the Hubbard parameters). These data suggest that the Klopman-Ohno formulation can be further optimized to produce much improved QM/MM interactions, especially when the solute is highly charged (Hou and Cui, work in progress).

In Fig.S1-S9, structures optimized at the SCC-DFTBPR level for the model compounds are presented. In Fig. S10, the radial distribution functions of water surrounding the oxygen in the solute from SCC-DFTBPR/TIP3P simulations are summarized; red (blue) corresponds to the solute in the reactant (zwitterionic) state of MMP. The dotted lines give the corresponding integrated numbers of water molecules.

**Table S1 Energetics Benchmark Calculations for SCC-DFTB with different parameterizations<sup>a</sup> Based on 19 Phosphate Reactions from the QCRNA Database<sup>b</sup>**

| Reactions <sup>c</sup>            | States <sup>c</sup>                    | DFT Reference <sup>d</sup> | SCC-DFTBPR SP <sup>e</sup> | SCC-DFTB, SP <sup>e</sup> | SCC-DFTBPR Opt Stable States <sup>e</sup> | SCC-DFTB, Opt Stable States <sup>e</sup> |
|-----------------------------------|----------------------------------------|----------------------------|----------------------------|---------------------------|-------------------------------------------|------------------------------------------|
| C6H5OH...P(O)(O)(-O-sugar-O-)     | P(O)(O)(-O-sugar-O-)                   |                            |                            |                           |                                           |                                          |
|                                   | C6H5-OH                                |                            |                            |                           |                                           |                                          |
|                                   | C6H5OH...P(O)(O)(-O-sugar-O-)_min1     | -21.4                      | 1.5                        | 1.5                       | 1.1                                       | 0.9                                      |
|                                   | C6H5OH...P(O)(O)(-O-sugar-O-)_ts12     | 9.9                        | -5.6                       | -12.9                     |                                           |                                          |
|                                   | C6H5OH...P(O)(O)(-O-sugar-O-)_min2     | 9.6                        | -5.3                       | -13.4                     | -7.6                                      | -14.6                                    |
|                                   | C6H5OH...P(O)(O)(-O-sugar-O-)_ts23     | 18.1                       | -10.3                      | -17.7                     |                                           |                                          |
|                                   | C6H5OH...P(O)(O)(-O-sugar-O-)_min3     | 9.6                        | -7.5                       | -12.5                     | -8.9                                      | -14.0                                    |
|                                   | C6H5OH...P(O)(O)(-O-sugar-O-)_ts34     | 12.9                       | -8.7                       | -7.3                      |                                           |                                          |
|                                   | C6H5OH...P(O)(O)(-O-sugar-O-)_min4     | -11.7                      | -3.0                       | -1.0                      | -4.1                                      | -1.6                                     |
| (CH3)2CHOH...P(O)(O)(-O-sugar-O-) | (CH3)2CHOH                             |                            |                            |                           |                                           |                                          |
|                                   | P(O)(O)(-O-sugar-O-)                   |                            |                            |                           |                                           |                                          |
|                                   | (CH3)2CHOH...P(O)(O)(-O-sugar-O-)_min1 | -12.8                      | 0.0                        | 1.3                       | -1.0                                      | -0.1                                     |
|                                   | (CH3)2CHOH...P(O)(O)(-O-sugar-O-)_ts12 | 22.7                       | -3.6                       | -2.5                      |                                           |                                          |
|                                   | (CH3)2CHOH...P(O)(O)(-O-sugar-O-)_min2 | 14.1                       | -2.9                       | -7.0                      | -3.9                                      | -8.5                                     |
|                                   | (CH3)2CHOH...P(O)(O)(-O-sugar-O-)_ts23 | 23.1                       | -6.7                       | -10.8                     |                                           |                                          |
|                                   | (CH3)2CHOH...P(O)(O)(-O-sugar-O-)_min3 | 13.8                       | -4.6                       | -7.4                      | -7.6                                      | -8.8                                     |
|                                   | (CH3)2CHOH...P(O)(O)(-O-sugar-O-)_ts34 | 14.5                       | -5.8                       | -5.1                      |                                           |                                          |
|                                   | (CH3)2CHOH...P(O)(O)(-O-sugar-O-)_min4 | -13.0                      | -0.8                       | 3.5                       | -0.7                                      | 3.4                                      |
| CH3COO...P(O)(OCH3)(OCH3)(OCH3)   | CH3COO                                 |                            |                            |                           |                                           |                                          |
|                                   | P(O)(OCH3)(OCH3)(OCH3)                 |                            |                            |                           |                                           |                                          |
|                                   | CH3COO...P(O)(OCH3)(OCH3)(OCH3)_min1   | -13.0                      | -2.6                       | -1.4                      | -4.5                                      | -3.9                                     |
|                                   | CH3COO...P(O)(OCH3)(OCH3)(OCH3)_ts12a  | 9.2                        | -5.8                       | -14.4                     |                                           |                                          |
|                                   | CH3COO...P(O)(OCH3)(OCH3)(OCH3)_min2a  | 9.4                        | -5.2                       | -14.4                     | Become min1                               | -19.7                                    |
|                                   | CH3COO...P(O)(OCH3)(OCH3)(OCH3)_ts2a3a | 28.7                       | -10.0                      | -13.0                     |                                           |                                          |
|                                   | CH3O                                   |                            |                            |                           |                                           |                                          |
|                                   | CH3COO...P(O)(OCH3)(OCH3)(OCH3)_min3a  | 46.2                       | -6.9                       | -8.8                      | -7.3                                      | -10.7                                    |
| CH3COO...P(O)(OH)(-O-CH2CH2-O-)   | CH3COO                                 |                            |                            |                           |                                           |                                          |
|                                   | P(O)(OH)(-O-CH2CH2-O-)                 |                            |                            |                           |                                           |                                          |
|                                   | CH3COO...P(O)(OH)(-O-CH2CH2-O-)_min1   | -38.0                      | 7.4                        | 7.2                       | 4.3                                       | 5.1                                      |
|                                   | CH3COO...P(O)(OH)(-O-CH2CH2-O-)_ts12a  | -0.5                       | -6.6                       | -12.6                     |                                           |                                          |

|                                |                                                 |       |      |       |      |       |
|--------------------------------|-------------------------------------------------|-------|------|-------|------|-------|
|                                | CH3COO...P(O)(OH)(-O-CH2CH2-O-) min2a           | -7.0  | -5.3 | -8.9  | -8.0 | -10.5 |
|                                | CH3COO...P(O)(OH)(-O-CH2CH2-O-) ts2a3a          | -3.7  | -5.5 | -3.6  |      |       |
|                                | CH3COO...P(O)(OH)(-O-CH2CH2-O-) min3a_1         | -35.3 | 0.5  | 3.0   | -1.0 | 3.2   |
|                                |                                                 |       |      |       |      |       |
| CH3COO...P(O)(OH)(OH)(OCH3)    | CH3COO                                          |       |      |       |      |       |
|                                | P(O)(OH)(OH)(OCH3)                              |       |      |       |      |       |
|                                | CH3COO...P(O)(OH)(OH)(OCH3) min1                | -45.8 | 7.2  | 8.6   | 7.4  | 9.4   |
|                                | CH3COO...P(O)(OH)(OH)(OCH3) ts12a               | 3.1   | -7.2 | -11.0 |      |       |
|                                | CH3COO...P(O)(OH)(OH)(OCH3) min2a               | -3.2  | -5.5 | -6.5  | -7.0 | -8.2  |
|                                | CH3COO...P(O)(OH)(OH)(OCH3) ts2a3a <sup>1</sup> | N/A   |      |       |      |       |
|                                | CH3COO...P(O)(OH)(OH)(OCH3) min3a               | -33.4 | -0.9 | 2.7   | -2.1 | 3.6   |
|                                |                                                 |       |      |       |      |       |
| CH3COO...P(O)(OH)(-O-sugar-O-) | CH3COO                                          |       |      |       |      |       |
|                                | P(O)(OH)(-O-sugar-O-)                           |       |      |       |      |       |
|                                | CH3COO...P(O)(OH)(-O-sugar-O-) ts12a            | -14.0 | -1.2 | -6.0  |      |       |
|                                | CH3COO...P(O)(OH)(-O-sugar-O-) min2a            | -14.2 | -1.0 | -6.2  | -3.1 | -7.7  |
|                                | CH3COO...P(O)(OH)(-O-sugar-O-) ts2a3a_1         | -4.1  | -6.2 | -12.0 |      |       |
|                                | CH3COO...P(O)(OH)(-O-sugar-O-) min3a            | -11.5 | -5.3 | -8.5  | -7.9 | -9.6  |
|                                | CH3COO...P(O)(OH)(-O-sugar-O-) ts3a4a           | -7.1  | -5.5 | -3.6  |      |       |
|                                | CH3COO...P(O)(OH)(-O-sugar-O-) min4a            | -33.7 | -0.6 | 2.6   | -3.3 | 1.5   |
|                                |                                                 |       |      |       |      |       |
| CH3OH...P(O)(O)(-O-CH2CH2-O-)  | P(O)(O)(-O-CH2CH2-O-)                           |       |      |       |      |       |
|                                | CH3OH                                           |       |      |       |      |       |
|                                | CH3OH...P(O)(O)(-O-CH2CH2-O-) min1              | -14.7 | 0.2  | 2.0   | -0.6 | 1.5   |
|                                | CH3OH...P(O)(O)(-O-CH2CH2-O-) ts12              | 22.4  | -3.8 | -2.5  |      |       |
|                                | CH3OH...P(O)(O)(-O-CH2CH2-O-) min2              | 13.7  | -1.6 | -5.8  | -2.4 | -7.2  |
|                                | CH3OH...P(O)(O)(-O-CH2CH2-O-) ts23a             | 22.7  | -5.8 | -10.0 |      |       |
|                                | CH3OH...P(O)(O)(-O-CH2CH2-O-) min3              | 13.8  | -3.5 | -5.3  | -6.3 | -7.9  |
|                                | CH3OH...P(O)(O)(-O-CH2CH2-O-) ts34              | 13.8  | -4.0 | -3.9  |      |       |
|                                | CH3OH...P(O)(O)(-O-CH2CH2-O-) min4              | -18.4 | 1.3  | 5.7   | 1.0  | 5.7   |
|                                |                                                 |       |      |       |      |       |
| CH3OH...P(O)(O)(-O-sugar-O-)   | CH3OH                                           |       |      |       |      |       |
|                                | P(O)(O)(-O-sugar-O-)                            |       |      |       |      |       |
|                                | CH3OH...P(O)(O)(-O-sugar-O-) min1               | -14.0 | -0.6 | 1.5   | -0.8 | 1.2   |
|                                | CH3OH...P(O)(O)(-O-sugar-O-) ts12               | 23.4  | -5.4 | -3.9  |      |       |
|                                | CH3OH...P(O)(O)(-O-sugar-O-) min2               | 13.5  | -2.0 | -6.0  | -2.8 | -7.3  |
|                                | CH3OH...P(O)(O)(-O-sugar-O-) ts23               | 22.4  | -6.3 | -10.0 |      |       |
|                                | CH3OH...P(O)(O)(-O-sugar-O-) min3               | 13.1  | -4.2 | -6.5  | -7.2 | -7.9  |
|                                | CH3OH...P(O)(O)(-O-sugar-O-) ts34               | 13.8  | -5.4 | -4.5  |      |       |

|                                     |                                            |       |      |      |      |      |
|-------------------------------------|--------------------------------------------|-------|------|------|------|------|
|                                     | CH3OH...P(O)(O)(-O-sugar-O-) _min4         | -14.4 | 0.6  | 5.5  | -0.7 | 4.3  |
| CH3O...P(O)(OCH3)(-O-CH2CH2-O-)     | CH3O                                       |       |      |      |      |      |
|                                     | P(O)(OCH3)(-O-CH2CH2-O-)                   |       |      |      |      |      |
|                                     | CH3O...P(O)(OCH3)(-O-CH2CH2-O-) _ts12      | -9.7  | 0.5  | -1.0 |      |      |
|                                     | CH3O...P(O)(OCH3)(-O-CH2CH2-O-) _min2      | -29.2 | 4.4  | -4.9 | 2.4  | -4.5 |
|                                     | CH3O...P(O)(OCH3)(-O-CH2CH2-O-) _ts23      | -28.5 | 4.3  | -4.8 |      |      |
|                                     | CH3O...P(O)(OCH3)(-O-CH2CH2-O-) _min3      | -30.3 | 4.2  | -4.4 | 2.2  | -3.7 |
|                                     | CH3O...P(O)(OCH3)(-O-CH2CH2-O-) _ts34      | -26.1 | 1.3  | 1.9  |      |      |
|                                     | CH3O...P(O)(OCH3)(-O-CH2CH2-O-) _min4      | -22.6 | 2.3  | 7.5  | -6.7 | 5.9  |
| CH3O...P(O)(OH)(OH)(OCH3)           | CH3O                                       |       |      |      |      |      |
|                                     | P(O)(OH)(OH)(OCH3)                         |       |      |      |      |      |
|                                     | CH3O...P(O)(OH)(OH)(OCH3) _ts12            | -24.2 | 6.0  | 5.9  |      |      |
|                                     | CH3O...P(O)(OH)(OH)(OCH3) _min2            | -30.5 | 6.0  | 2.3  | 6.5  | 3.2  |
|                                     | CH3O...P(O)(OH)(OH)(OCH3) _ts23            | -25.3 | 5.9  | 5.8  |      |      |
|                                     | CH3OH                                      |       |      |      |      |      |
|                                     | P(O)(O)(OH)(OCH3)                          | -51.5 | 8.5  | 10.8 | 8.6  | 13.3 |
| HOH...P(O)(O)(-O-2'methyl-sugar-O-) | HOH                                        |       |      |      |      |      |
|                                     | P(O)(O)(-O-2'methyl-sugar-O-)              |       |      |      |      |      |
|                                     | HOH...P(O)(O)(-O-2'methyl-sugar-O-) _min1  | -14.4 | -2.3 | 2.1  | -2.7 | 1.6  |
|                                     | HOH...P(O)(O)(-O-2'methyl-sugar-O-) _ts12a | 24.6  | -2.3 | 3.4  |      |      |
|                                     | HOH...P(O)(O)(-O-2'methyl-sugar-O-) _min2a | 14.4  | -3.4 | -4.2 | -4.3 | -6.4 |
|                                     | HOH...P(O)(O)(-O-2'methyl-sugar-O-) _ts23a | 23.7  | -7.1 | -9.6 |      |      |
|                                     | HOH...P(O)(O)(-O-2'methyl-sugar-O-) _min3a | 13.7  | -3.9 | -5.1 | -7.1 | -7.4 |
|                                     | HOH...P(O)(O)(-O-2'methyl-sugar-O-) _ts34a | 14.1  | -3.9 | -3.2 |      |      |
|                                     | HOH...P(O)(O)(-O-2'methyl-sugar-O-) _min4a | -13.6 | 1.7  | 4.4  | -0.2 | 3.0  |
| HOH...P(O)(O)(-O-CH2CH2-O-)         | HOH                                        |       |      |      |      |      |
|                                     | P(O)(O)(-O-CH2CH2-O-)                      |       |      |      |      |      |
|                                     | HOH...P(O)(O)(-O-CH2CH2-O-) _min1          | -15.3 | -2.1 | 2.4  | -2.7 | 1.9  |
|                                     | HOH...P(O)(O)(-O-CH2CH2-O-) _ts12          | 23.4  | -1.3 | 4.6  |      |      |
|                                     | HOH...P(O)(O)(-O-CH2CH2-O-) _min2          | 13.7  | -2.3 | -2.8 | -2.9 | -5.2 |
|                                     | HOH...P(O)(O)(-O-CH2CH2-O-) _ts23          | 23.3  | -6.6 | -8.6 |      |      |
|                                     | HOH...P(O)(O)(-O-CH2CH2-O-) _min3          | 13.1  | -3.0 | -3.8 | -5.1 | -5.9 |
|                                     | HOH...P(O)(O)(-O-CH2CH2-O-) _ts34          | 14.4  | -4.6 | -2.6 |      |      |
|                                     | HOH...P(O)(O)(-O-CH2CH2-O-) _min4          | -19.4 | 3.3  | 6.5  | 2.6  | 6.1  |

|                               |                                      |       |      |       |      |       |
|-------------------------------|--------------------------------------|-------|------|-------|------|-------|
| HO...P(O)(OCH3)(-O-CH2CH2-O-) | HO                                   |       |      |       |      |       |
|                               | P(O)(OCH3)(-O-CH2CH2-O-)             |       |      |       |      |       |
|                               | HO...P(O)(OCH3)(-O-CH2CH2-O-) ts12   | -13.8 | 1.3  | -6.0  |      |       |
|                               | HO...P(O)(OCH3)(-O-CH2CH2-O-) min2   | -39.3 | 9.8  | -19.1 | 3.5  | -27.2 |
|                               | HO...P(O)(OCH3)(-O-CH2CH2-O-) ts23   | -39.5 | 8.1  | -18.6 |      |       |
|                               | HO...P(O)(OCH3)(-O-CH2CH2-O-) min3   | -39.6 | 9.7  | -19.7 | 3.2  | -20.8 |
|                               | HO...P(O)(OCH3)(-O-CH2CH2-O-) ts34   | -34.5 | 6.6  | -15.1 |      |       |
|                               | HO...P(O)(OCH3)(-O-CH2CH2-O-) min4_1 | -37.3 | 8.4  | -12.0 | 3.8  | -16.1 |
|                               |                                      |       |      |       |      |       |
| HO...P(O)(OCH3)(OCH3)(OCH3)   | HO                                   |       |      |       |      |       |
|                               | P(O)(OCH3)(OCH3)(OCH3)               |       |      |       |      |       |
|                               | HO...P(O)(OCH3)(OCH3)(OCH3) ts12     | -16.8 | -1.7 | -13.5 |      |       |
|                               | HO...P(O)(OCH3)(OCH3)(OCH3) min2     | -29.9 | 4.7  | -22.1 | 3.3  | -23.5 |
|                               | HO...P(O)(OCH3)(OCH3)(OCH3) ts23     | -27.2 | 4.8  | -23.2 |      |       |
|                               | HO...P(O)(OCH3)(OCH3)(OCH3) min3     | -30.5 | 6.0  | -21.5 | 4.1  | -22.9 |
|                               | HO...P(O)(OCH3)(OCH3)(OCH3) ts34     | -25.7 | 3.7  | -24.0 |      |       |
|                               | HO...P(O)(OCH3)(OCH3)(OCH3) min4     | -27.4 | 4.0  | -23.9 | 0.7  | -26.0 |
|                               | HO...P(O)(OCH3)(OCH3)(OCH3) ts45     | -18.8 | -0.8 | -24.6 |      |       |
|                               | CH3O                                 |       |      |       |      |       |
|                               | P(O)(OH)(OCH3)(OCH3) min1            | -7.9  | 5.5  | -19.9 | 4.7  | -22.0 |
|                               |                                      |       |      |       |      |       |
| HO...P(O)(OCH3)(-O-sugar-O-)  | HO                                   |       |      |       |      |       |
|                               | P(O)(OCH3)(-O-sugar-O-)              |       |      |       |      |       |
|                               | HO...P(O)(OCH3)(-O-sugar-O-) ts12    | -16.8 | 1.3  | -5.4  |      |       |
|                               | HO...P(O)(OCH3)(-O-sugar-O-) min2    | -46.7 | 9.3  | -16.9 | 4.8  | -24.7 |
|                               | HO...P(O)(OCH3)(-O-sugar-O-) ts23    | -44.1 | 8.4  | -18.0 |      |       |
|                               | HO...P(O)(OCH3)(-O-sugar-O-) min3    | -45.5 | 6.6  | -18.8 | 3.0  | -26.0 |
|                               | HO...P(O)(OCH3)(-O-sugar-O-) ts34    | -39.9 | 7.7  | -13.4 |      |       |
|                               | HO...P(O)(OCH3)(-O-sugar-O-) min4    | -41.3 | 8.7  | -11.7 | 4.2  | -15.3 |
|                               |                                      |       |      |       |      |       |
| HO...P(O)(OH)(OH)(OCH3)       | HO                                   |       |      |       |      |       |
|                               | P(O)(OH)(OH)(OCH3)                   |       |      |       |      |       |
|                               | HO...P(O)(OH)(OH)(OCH3) ts12         | -32.1 | 12.8 | -4.1  |      |       |
|                               | HO...P(O)(OH)(OH)(OCH3) min2         | -39.4 | 9.9  | -11.8 | 9.7  | -13.3 |
|                               | HO...P(O)(OH)(OH)(OCH3) ts23         | -34.8 | 10.5 | -9.6  |      |       |
|                               | CH3OH                                |       |      |       |      |       |
|                               | P(O)(O)(OH)(OH)                      | -60.7 | 14.4 | -5.2  | 14.8 | -4.5  |
|                               |                                      |       |      |       |      |       |
| P(O)(O)(OH)(OC6H5)            | P(O)(O)(OH)(OC6H5)                   |       |      |       |      |       |

|                                     |                                      |      |      |       |      |       |
|-------------------------------------|--------------------------------------|------|------|-------|------|-------|
|                                     | P(O)(O)(OH)(OC6H5)_ts12              | 30.1 | 5.2  | 1.8   |      |       |
|                                     | P(O)(O)(O)                           |      |      |       |      |       |
|                                     | C6H5-OH                              | 26.4 | 2.7  | 3.5   | 4.4  | 4.4   |
|                                     |                                      |      |      |       |      |       |
| P(O)(OH)(OH)(OH)(OH)_PR             | P(O)(OH)(OH)(OH)(OH)_min1_PR         |      |      |       |      |       |
|                                     | P(O)(OH)(OH)(OH)(OH)_ts1_PR          | 7.0  | -5.9 | -6.2  |      |       |
|                                     | P(O)(OH)(OH)(OH)(OH)_min1_PR         |      |      |       |      |       |
|                                     |                                      |      |      |       |      |       |
| P(O)(OH)(-O-CH2CH2-O-)(OCH3)_Mig    | P(O)(OH)(-O-CH2CH2-O-)(OCH3)_min2_PR |      |      |       |      |       |
|                                     | P(O)(OH)(-O-CH2CH2-O-)(OCH3)_ts2_PR  | 7.4  | -3.9 | -2.3  |      |       |
|                                     | P(O)(OCH3)(-O-CH2CH2-O-)(OH)_min2_PR | 7.2  | -2.7 | -1.8  | -7.6 | -1.4  |
|                                     | HO...P(O)(OCH3)(-O-CH2CH2-O-)_ts34   | 12.3 | -5.8 | 2.8   |      |       |
|                                     | HO...P(O)(OCH3)(-O-CH2CH2-O-)_min4_1 | 9.5  | -4.0 | 5.9   | -7.0 | 3.3   |
| <b>Error Analysis</b>               |                                      |      |      |       |      |       |
| <b>Overall Performance</b>          | MAXE <sup>†</sup>                    |      | 14.4 | -24.6 |      |       |
|                                     | RMSE <sup>†</sup>                    |      | 5.6  | 10.3  |      |       |
|                                     | MUE <sup>†</sup>                     |      | 4.8  | 8.2   |      |       |
|                                     | MSE <sup>†</sup>                     |      | -0.2 | -6.0  |      |       |
| <b>Stable States Performance</b>    | MAXE                                 |      | 14.4 | -23.9 | 14.8 | -27.2 |
|                                     | RMSE                                 |      | 5.3  | 9.9   | 5.3  | 11.8  |
|                                     | MUE                                  |      | 4.3  | 7.9   | 4.5  | 9.1   |
|                                     | MSE                                  |      | 1.0  | -4.6  | -0.8 | -6.1  |
| <b>Transition State Performance</b> | MAXE                                 |      | 12.8 | -24.6 |      |       |
|                                     | RMSE                                 |      | 6.0  | 10.6  |      |       |
|                                     | MUE                                  |      | 5.4  | 8.7   |      |       |
|                                     | MSE                                  |      | -1.6 | -7.5  |      |       |

- See Table 1 in the main text for notation of different SCC-DFTB parameterizations .
- <http://theory.chem.umn.edu/QCRNA/> generated by Darrin York's group of the Department of Chemistry of the University of Minnesota.
- Reaction and state naming scheme follows QCRNA convention, please refer to <http://theory.chem.umn.edu/QCRNA/Nomenclature.html>
- Reaction energetics (relative energy with respect to the reactant state; exothermicity and energy barrier) in kcal/mol; energies are from single point energy calculations at the B3LYP/6-311++G(3df, 2p) level based on the optimized geometry at the

B3LYP/6-31++G(d, p) level from QCRNA; gas phase 0K electronic energy without zero-point vibrational energy correction is used.

- e) Energy difference from the DFT reference, i.e.,  $\Delta E_{\text{SCCDFTB}} - \Delta E_{\text{DFT}}$ . “SP” refers single point energy calculations with a SCC-DFTB parameterization at the QCRNA structures; “Stable Opt” refers to calculations in which the structure is also optimized at the SCC-DFTB level, which is only done for the stable state.
- f) MAXE: largest error; RMSE: root-mean-square error, defined as  $\langle(\text{err})^2\rangle^{1/2}$ ; MUE: mean unsigned error; MSE: mean signed error.

**Table S2 Dipole moment Benchmark Calculations for SCC-DFTB with different parameterizations Based on Representative Phosphate Species from QCRNA Database<sup>a</sup>**

| Related Reactions                      | States                                | DFT Reference                           | Standard SCC-DFTB, SP | SCC-DFTBPR, SP | Standard SCC-DFTB, Opt Stable States | SCC-DFTBPR, Opt Stable States |       |
|----------------------------------------|---------------------------------------|-----------------------------------------|-----------------------|----------------|--------------------------------------|-------------------------------|-------|
| CH3OH...P(O)(OCH3)(-O-CH2CH2-O-)       | P(O)(OCH3)(-O-CH2CH2-O-)              | 3.88                                    | -0.81                 | 0.10           | -0.78                                | 0.22                          |       |
|                                        | CH3OH...P(O)(OCH3)(-O-CH2CH2-O-)_ts12 | 3.47                                    | -0.50                 | 0.41           | N/A                                  | N/A                           |       |
|                                        | CH3OH...P(O)(OCH3)(-O-CH2CH2-O-)_min2 | 2.29                                    | -0.55                 | 0.09           | -0.70                                | 0.04                          |       |
|                                        | CH3OH...P(O)(OCH3)(-O-CH2CH2-O-)_ts23 | 3.04                                    | -0.54                 | -0.02          | N/A                                  | N/A                           |       |
|                                        | CH3OH...P(O)(OCH3)(-O-CH2CH2-O-)_min3 | 3.76                                    | -0.94                 | -0.35          | -0.91                                | -0.74                         |       |
|                                        | CH3OH...P(O)(OCH3)(-O-CH2CH2-O-)_ts34 | 3.45                                    | -0.26                 | 0.59           | N/A                                  | N/A                           |       |
|                                        | CH3OH...P(O)(OCH3)(-O-CH2CH2-O-)_min4 | 4.71                                    | -0.72                 | 0.46           | -0.61                                | 0.76                          |       |
|                                        | P(OCH3)(OCH3)(OCH3)(OCH3)(OCH3)_PR    | P(OCH3)(OCH3)(OCH3)(OCH3)(OCH3)_min1_PR | 1.17                  | -0.19          | -0.07                                | -0.10                         | -0.17 |
| P(OCH3)(OCH3)(OCH3)(OCH3)(OCH3)_ts1_PR |                                       | 1.47                                    | -0.13                 | 0.07           | N/A                                  | N/A                           |       |
| P(O..H..O)(-O-CH2CH2-O-)               | P(O)(OH)(-O-CH2CH2-O-)                | 4.10                                    | -0.93                 | -0.09          | -0.91                                | 0.21                          |       |
|                                        | P(O..H..O)(-O-CH2CH2-O-)_ts12         | 5.26                                    | -1.24                 | -0.27          | N/A                                  | N/A                           |       |
| CH3OH...P(O)(OH)(OCH3)(OCH3)           | P(O)(OH)(OCH3)(OCH3)_min1             | 1.24                                    | -0.28                 | 0.29           | -0.49                                | 0.19                          |       |
|                                        | CH3OH...P(O)(OH)(OCH3)(OCH3)_ts12     | 1.64                                    | 0.05                  | 0.51           | N/A                                  | N/A                           |       |
|                                        | CH3OH...P(O)(OH)(OCH3)(OCH3)_min2     | 1.69                                    | -0.34                 | 0.10           | -0.51                                | -0.26                         |       |
|                                        | CH3OH...P(O)(OH)(OCH3)(OCH3)_ts23     | 2.99                                    | 0.20                  | 0.84           | N/A                                  | N/A                           |       |
| Individual molecule                    | P(OCH3)(OCH3)(-O-CH2CH2-O-)(OCH3)     | 1.51                                    | -0.34                 | -0.01          | -0.17                                | 0.12                          |       |
|                                        | P(O)(OCH3)(-O-sugar-O-)               | 2.91                                    | -0.81                 | 0.02           | -1.17                                | -0.29                         |       |
|                                        | P(O)(OH)(OH)(OCH3)                    | 0.98                                    | -0.22                 | 0.19           | -0.26                                | 0.33                          |       |
|                                        | P(O)(OH)(OH)(OH):HOH                  | 1.68                                    | -0.12                 | 0.20           | 0.53                                 | -0.05                         |       |
|                                        | P(O)(OH)(OH)(OH)                      | 0.51                                    | -0.03                 | 0.26           | 0.19                                 | 0.60                          |       |
|                                        | P(O)(O)(OH)                           | 3.21                                    | -0.50                 | -0.38          | -0.25                                | -0.06                         |       |
|                                        | P(O)(OH)(-O-CH2CH2-O-):CH3OH          | 2.61                                    | -0.62                 | 0.07           | 0.13                                 | 1.14                          |       |
|                                        | P(OCH3)(OCH3)(OCH3)(OH)(OH)           | 1.05                                    | -0.16                 | -0.07          | -0.10                                | -0.10                         |       |
|                                        | <b>Error Analysis</b>                 |                                         |                       |                |                                      |                               |       |
|                                        |                                       | MAXE                                    |                       | -1.24          | 0.84                                 | -1.17                         | 1.14  |
|                                        | RMSE                                  |                                         | 0.56                  | 0.32           | 0.59                                 | 0.45                          |       |
|                                        | MUE                                   |                                         | 0.46                  | 0.24           | 0.49                                 | 0.33                          |       |
|                                        | MSE                                   |                                         | -0.43                 | 0.13           | -0.38                                | 0.12                          |       |



a. The format of the table is the same as Table S1, except that the reference values are dipole moments calculated at the B3LYP/6-311++G(3df,2p)//B3LYP/6-31++G(d,p) level and given in Debye

**Table S3. Binding energy between MMP in different chemical states in the dissociative pathway and nearby water molecules**

| Chemical State <sup>a</sup> | Binding Energy <sup>b</sup> (kcal/mol) |                         |                            |
|-----------------------------|----------------------------------------|-------------------------|----------------------------|
|                             | B3LYP/6-31++G**                        | SCC-DFTBPR <sup>c</sup> | SCC-DFTBPR/MM <sup>d</sup> |
| <b>Reactant</b>             | -89.7                                  | -94.3                   | -129.1 (-128.1) [-97.8]    |
| <b>Zwitterionic</b>         | -109.1                                 | -116.7                  | -165.1 (-163.4) [-126.4]   |
| <b>Intermediate</b>         | -63.4                                  | -67.4                   | -90.6 (-89.8) [-75.2]      |

- a) Ten snapshots are collected from the last 20 ps trajectory from 2D PMF simulations for the relevant region. For each chemical state, 10 snapshots are studied and the average values are presented in the table.
- b) Water molecules within 3 Å from atoms O7, O8 or O9 (see Fig. S10) are selected as the first solvation shell. The binding energies studied are vertical values, i.e., using the structure collected from the trajectory without any further geometry optimization.
- c) All atoms are treated with SCC-DFTBPR.
- d) The MMP is described by SCC-DFTBPR, and water molecules are treated as the TIP3P model. Numbers without parentheses are results using the standard (CHARMM lipid) van der Waals parameters for the QM atoms and Coulombic QM/MM interaction; numbers with parentheses are obtained with the optimized QM van der Waals parameters (following the standard procedure as described in Ref. 82 of the main text, for example, based on the molecular complex between MMP in the reactant state and a water molecule) and Coulombic QM/MM interaction; numbers with brackets are obtained with the standard (CHARMM lipid) QM van der Waals parameters and Klopman-Ohno QM/MM interaction (see, for example, Ref. 60).

# DMP (Di-methyl Phosphate) Associative Mechanism

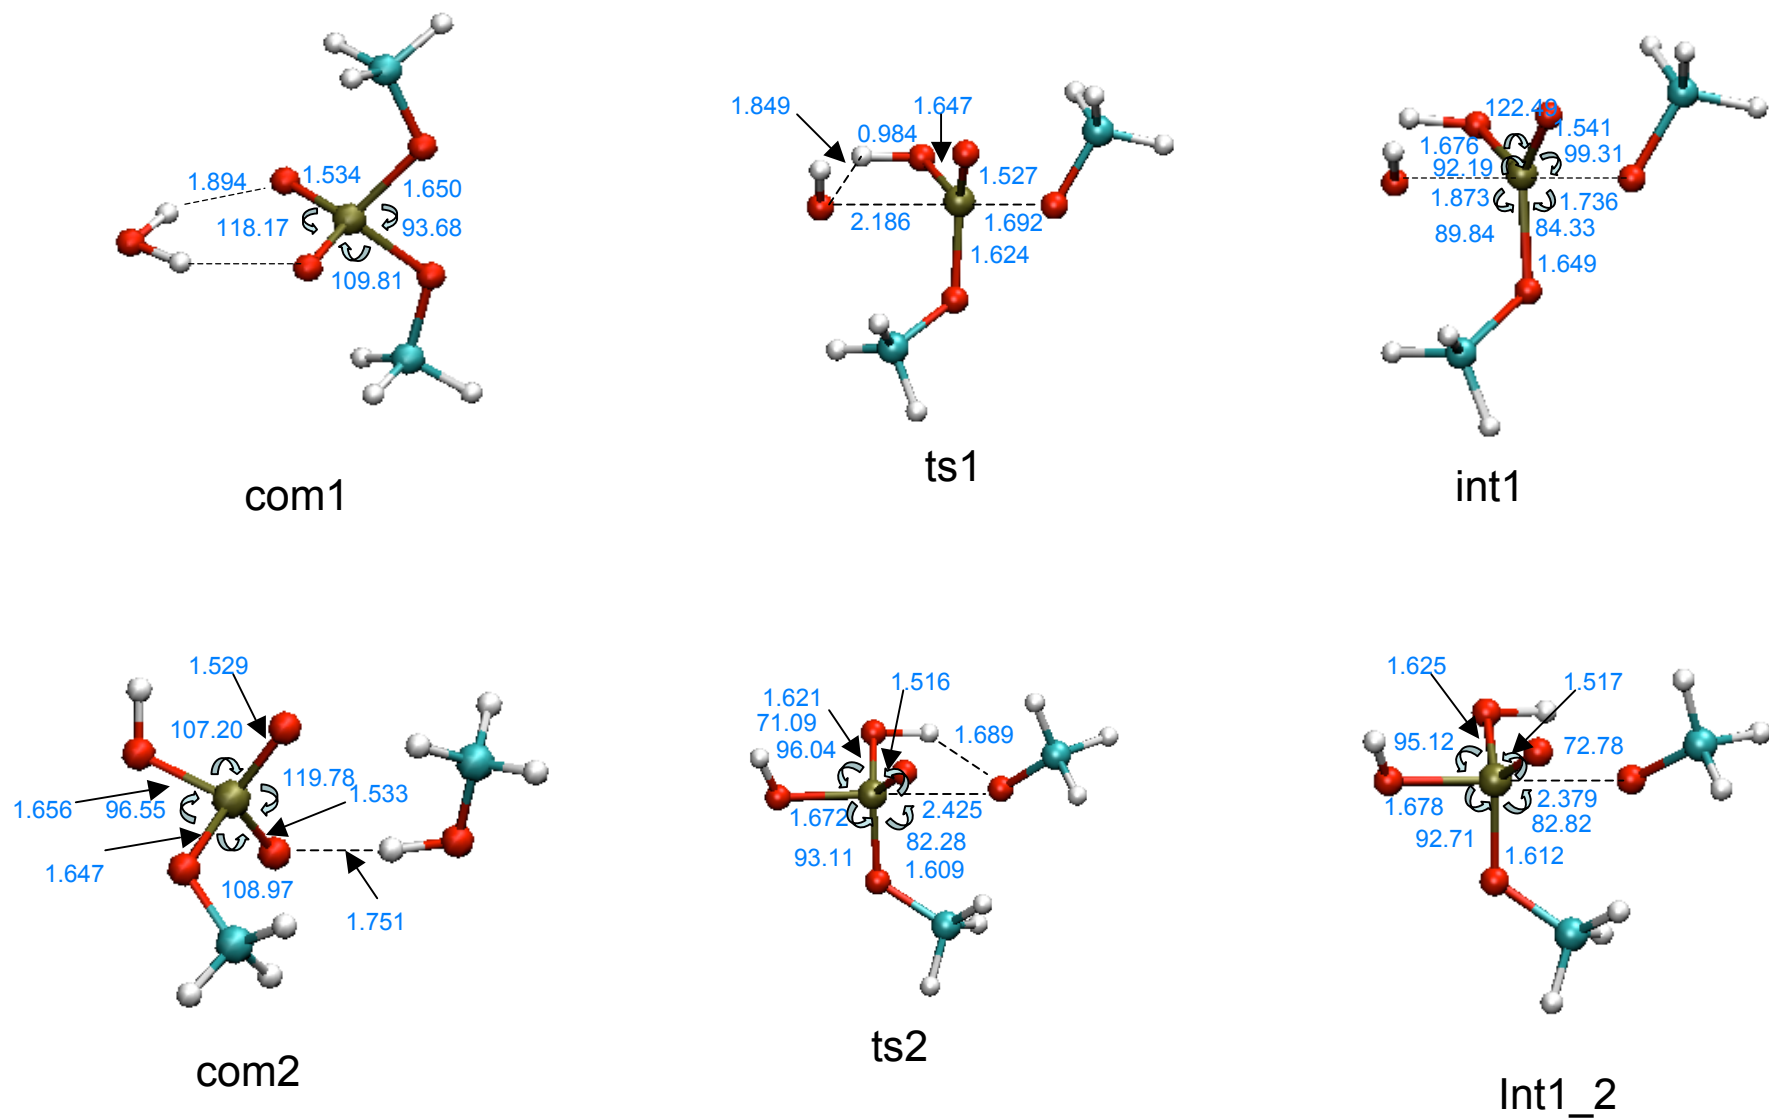

Fig. S1

# Protonated DMP (DMP\_P) Associative Mechanism

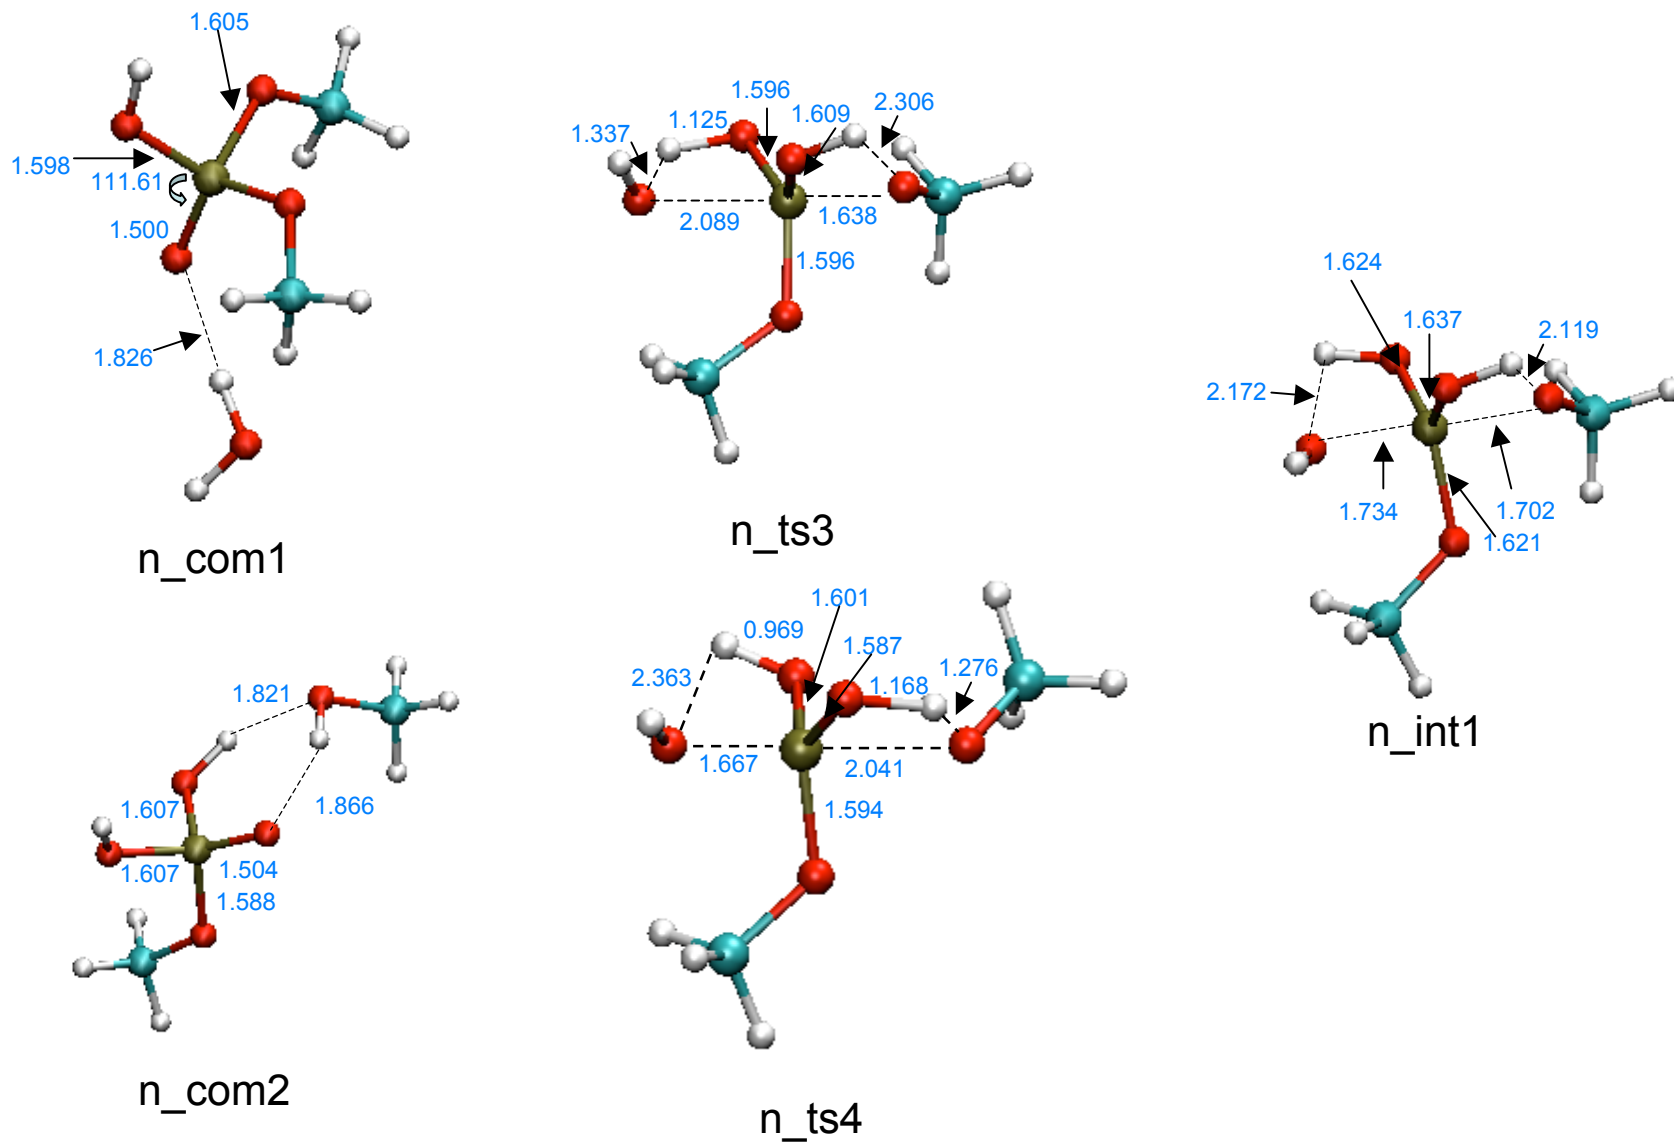

Fig. S2

# Protonated DMP (DMP\_P) Dissociative Mechanism

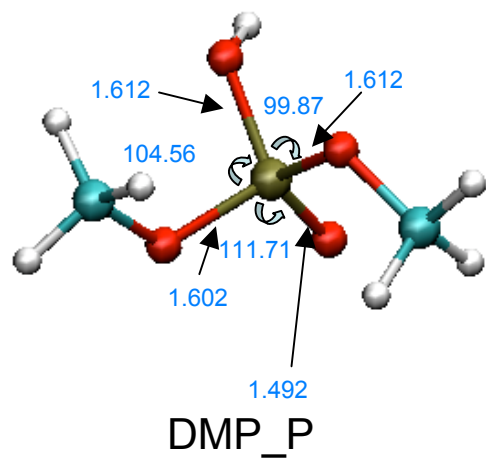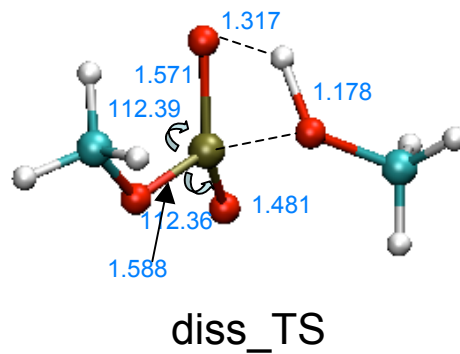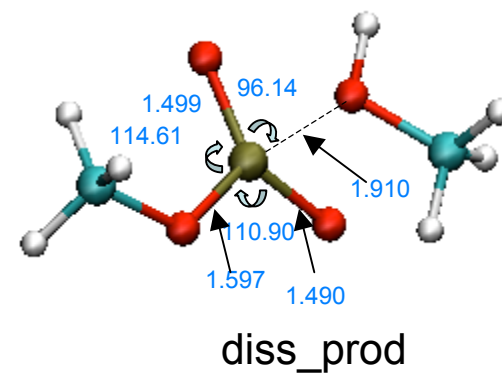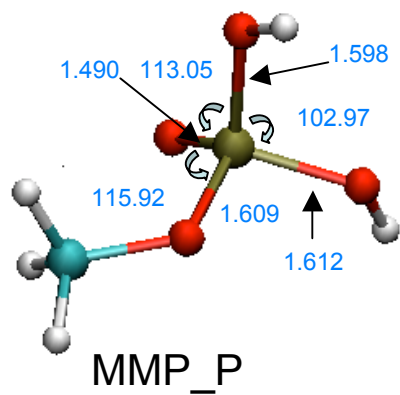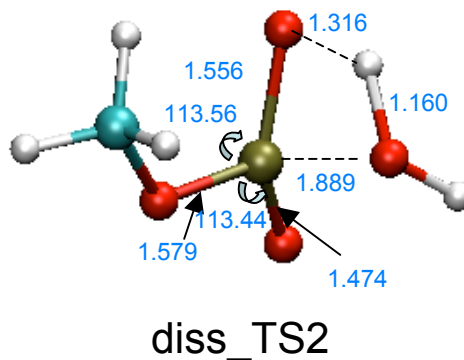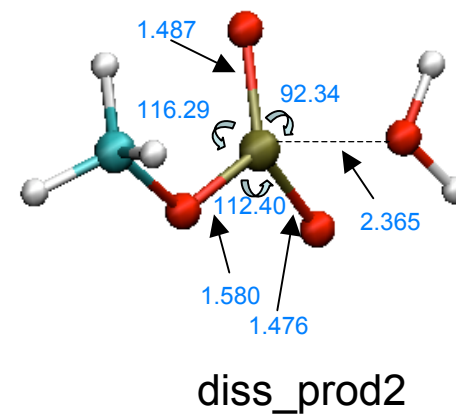

Fig. S3

# DMP\_P + extra water Dissociative Mechanism

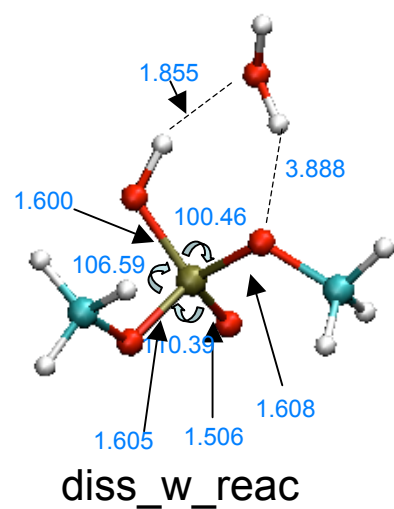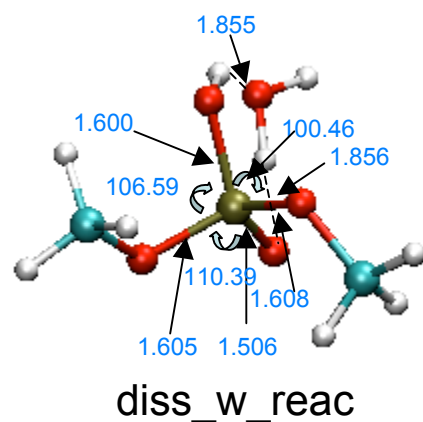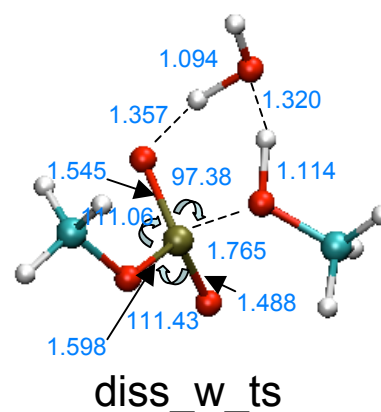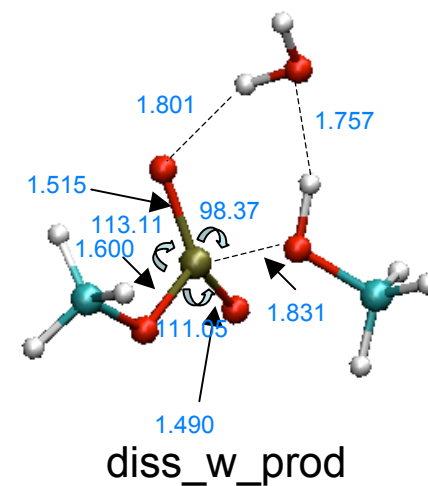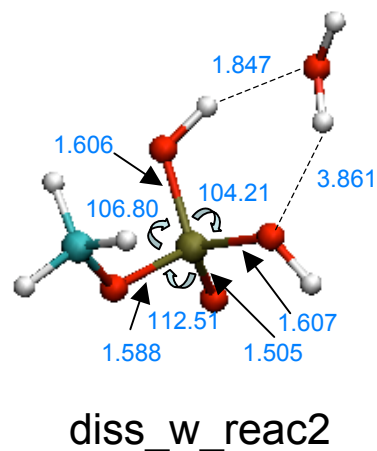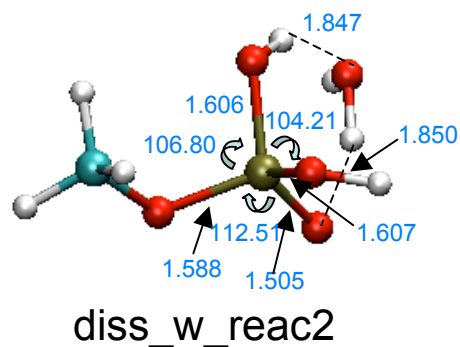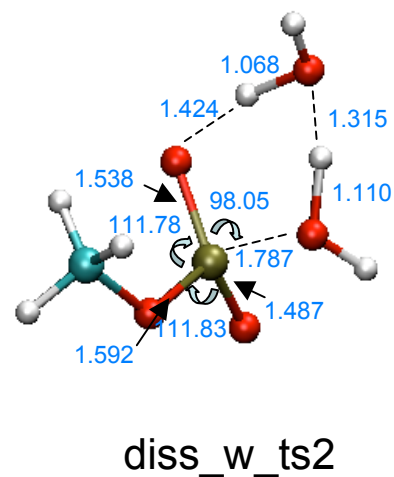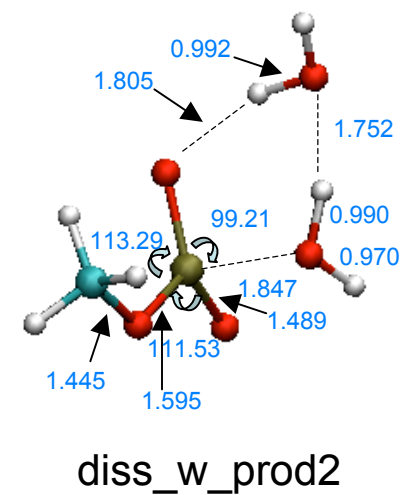

Fig. S4

# DMP\_P + extra H<sub>2</sub>O Associative Mechanism

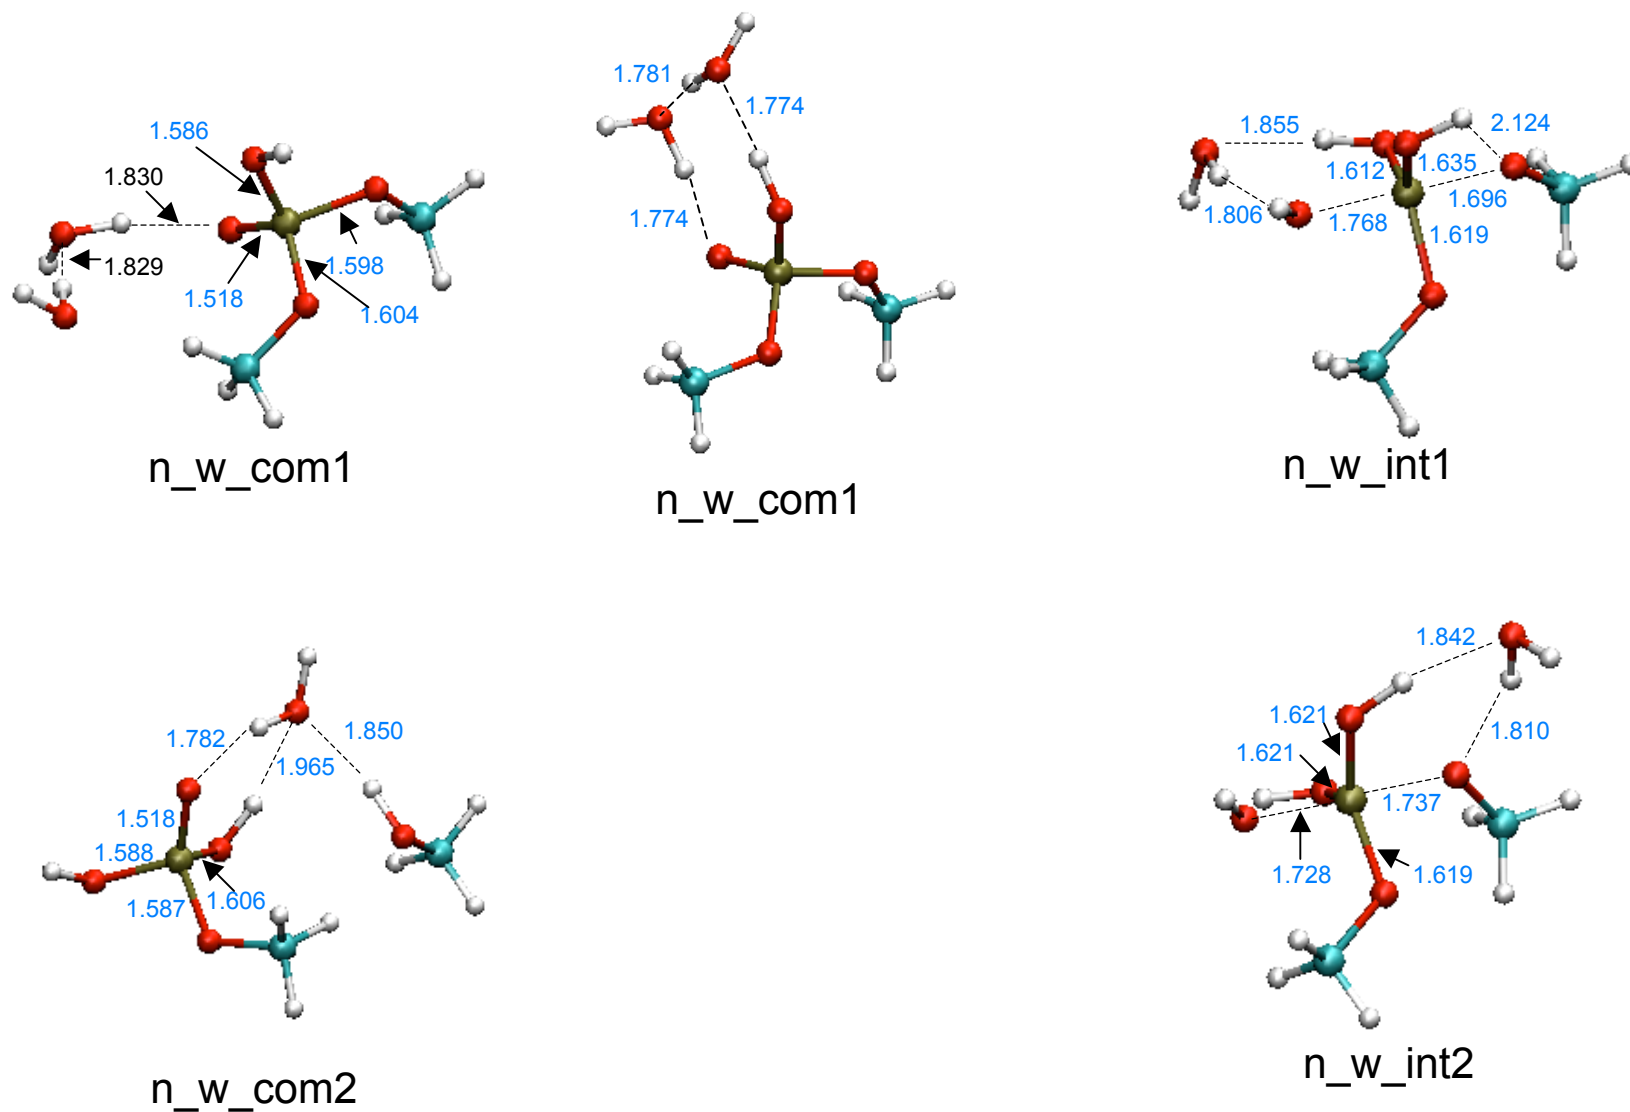

Fig. S5

# MMP Associative Mechanism

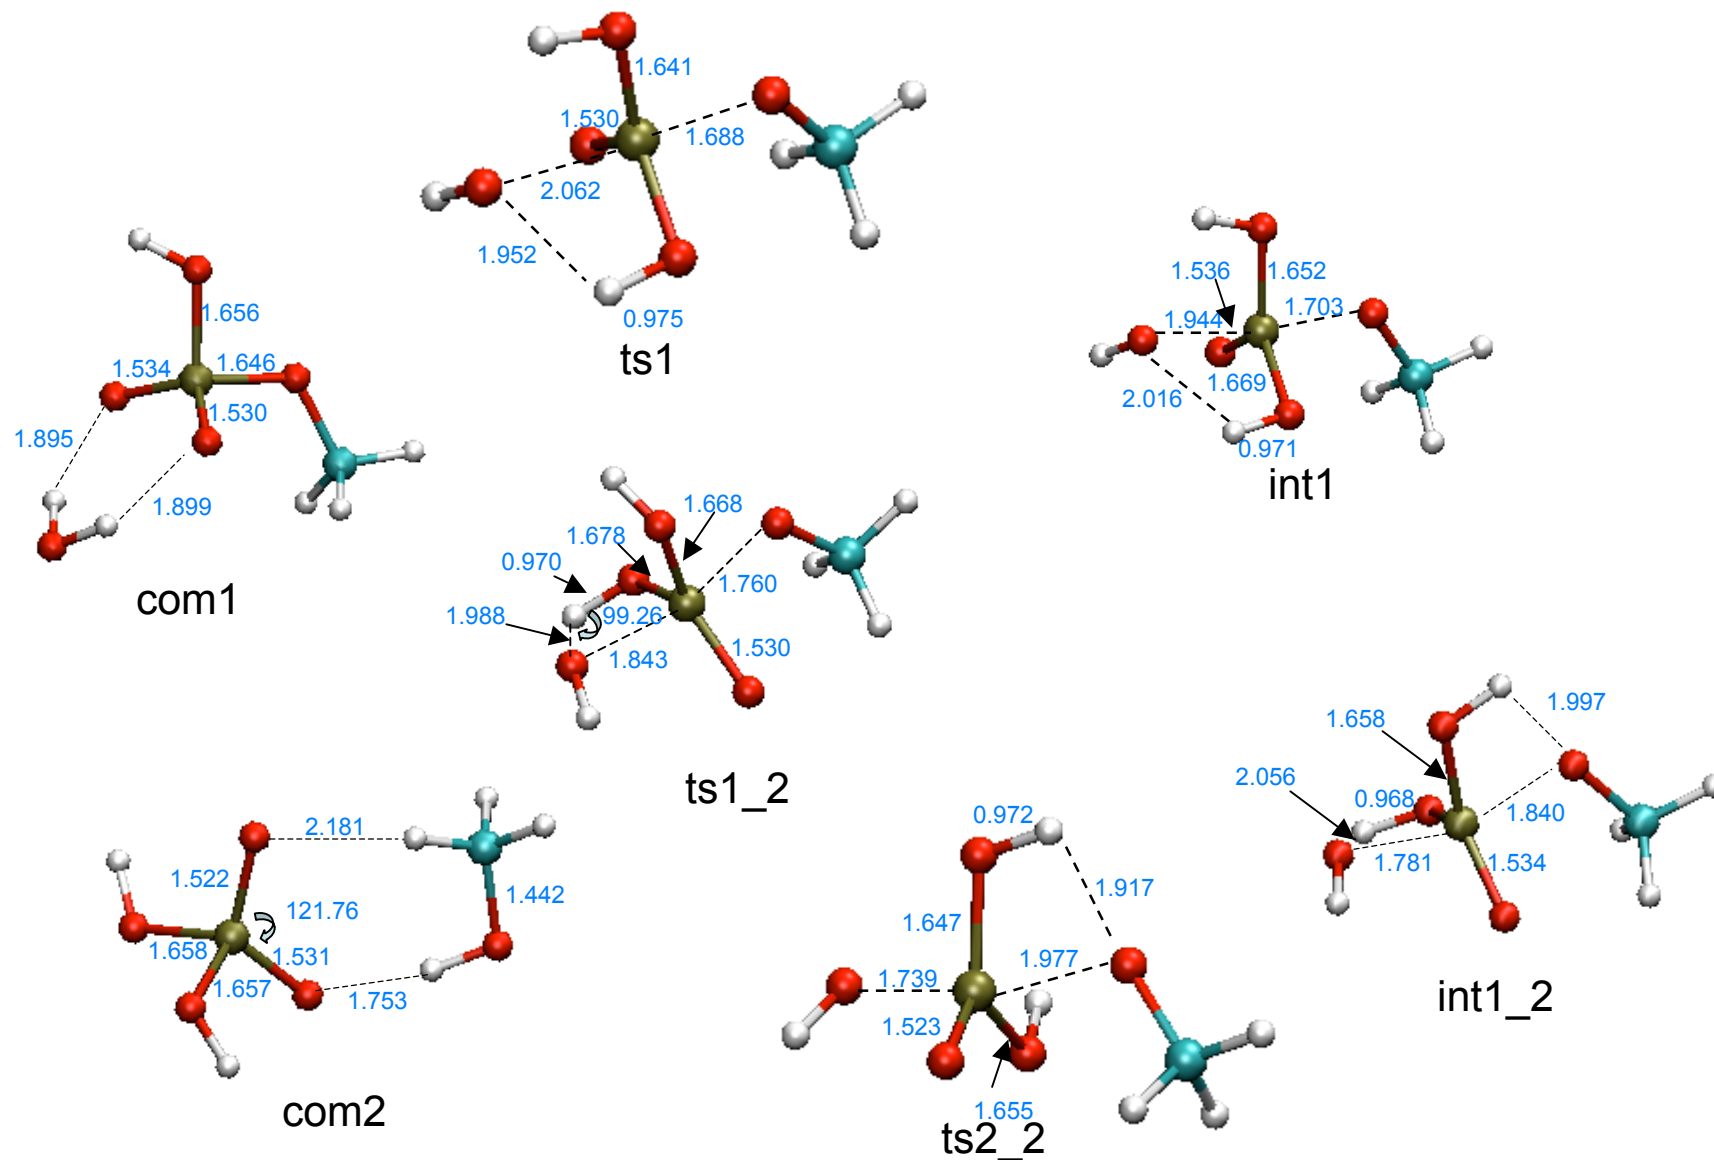

Fig. S6



# MMP + extra H<sub>2</sub>O Associative Mechanism

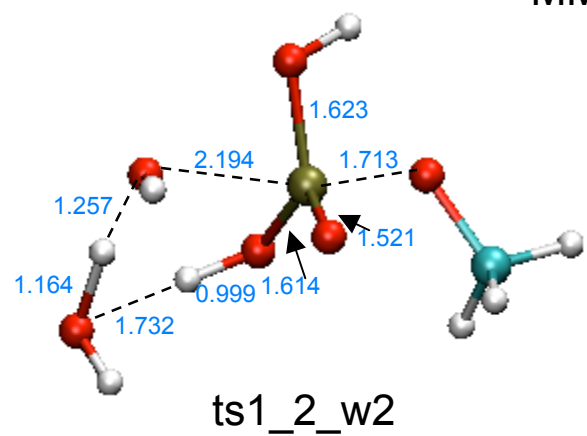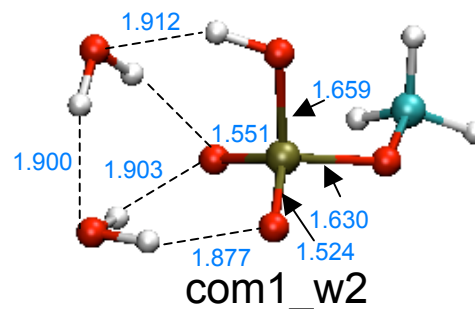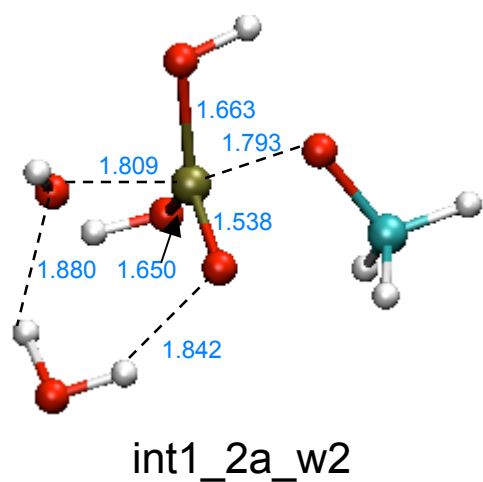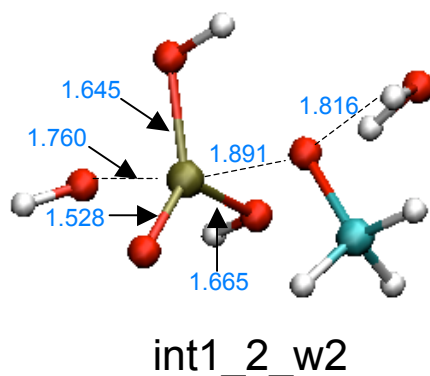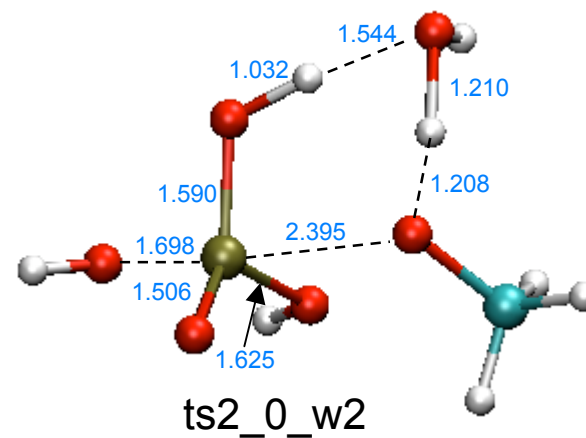

Fig. S7

## Dianionic MMP Associative & Dissociative Mechanisms

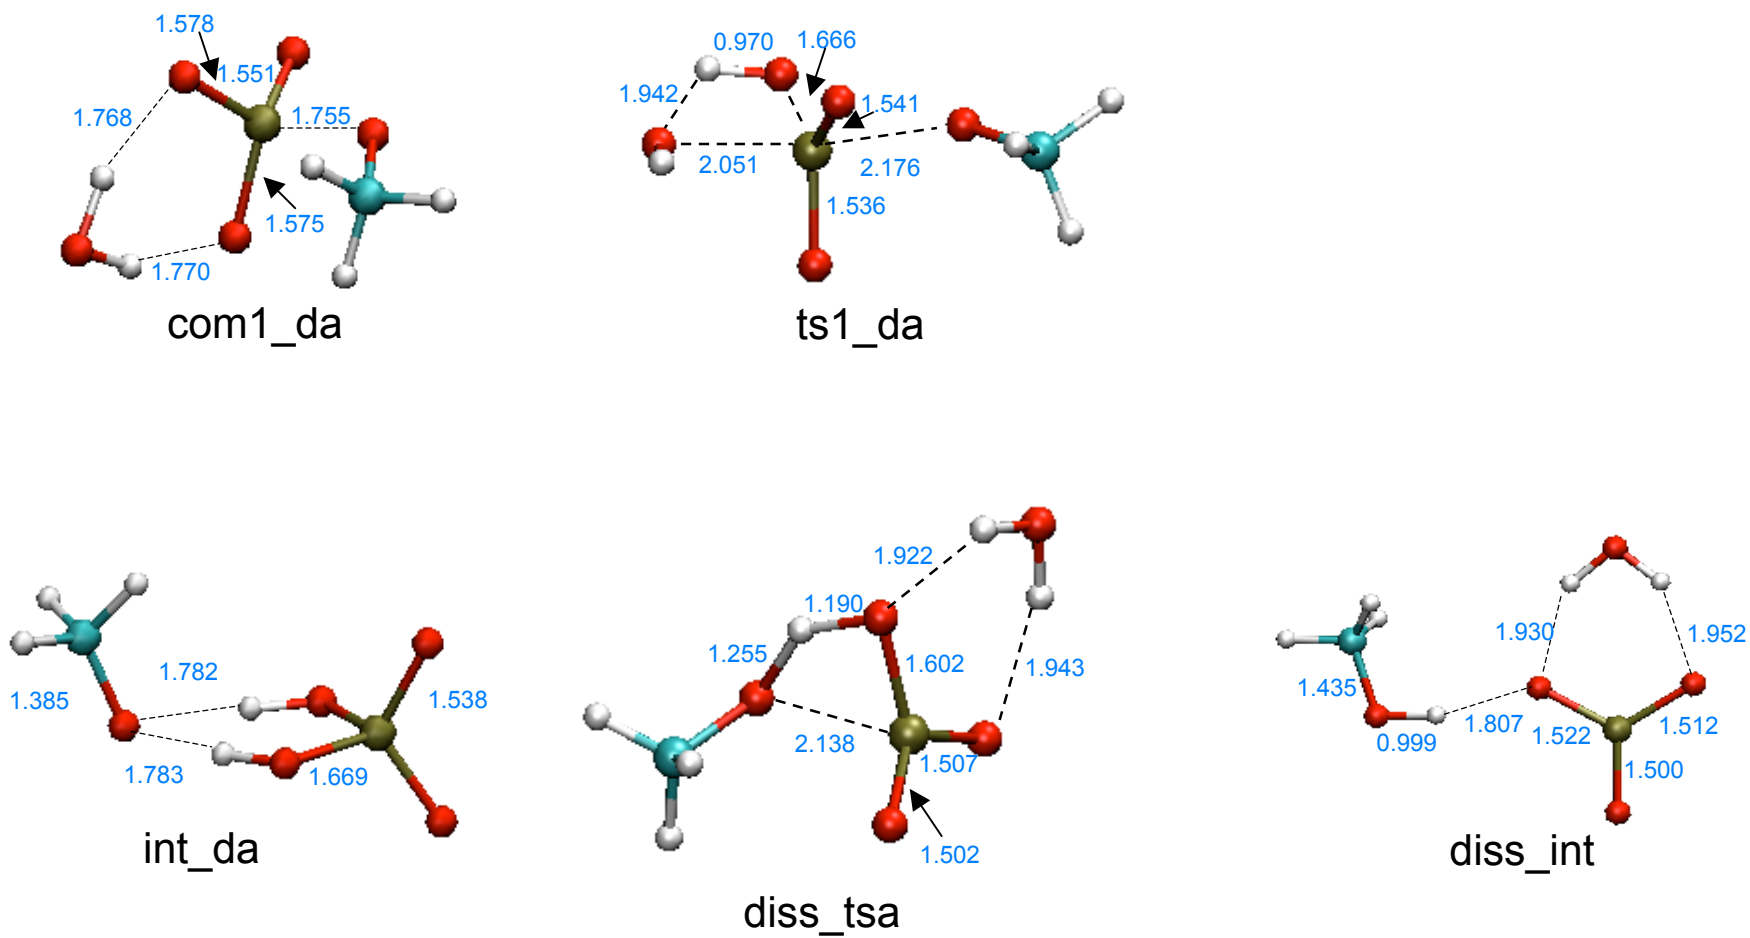

Fig. S8

# Phosphate

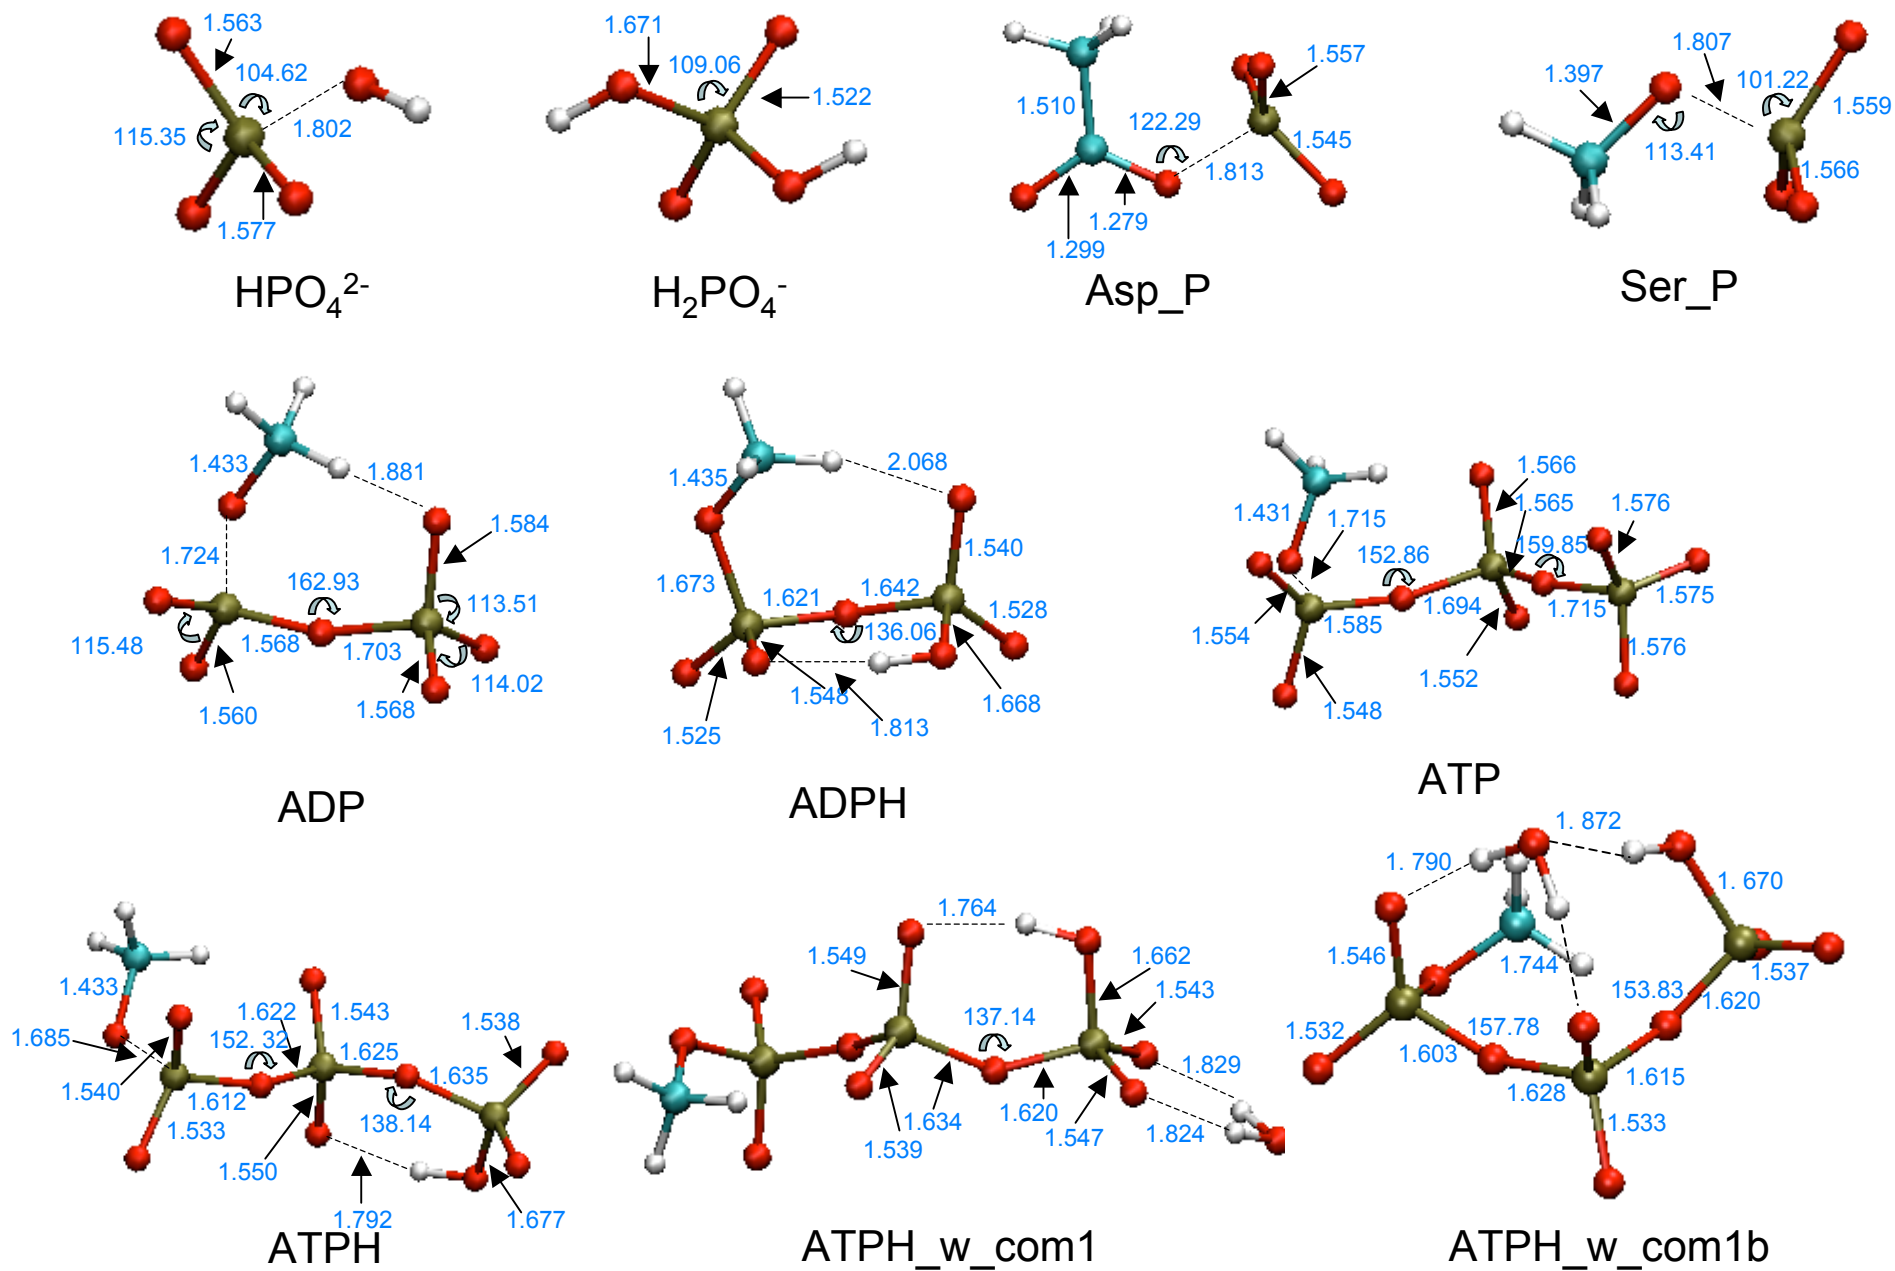

Fig. S9

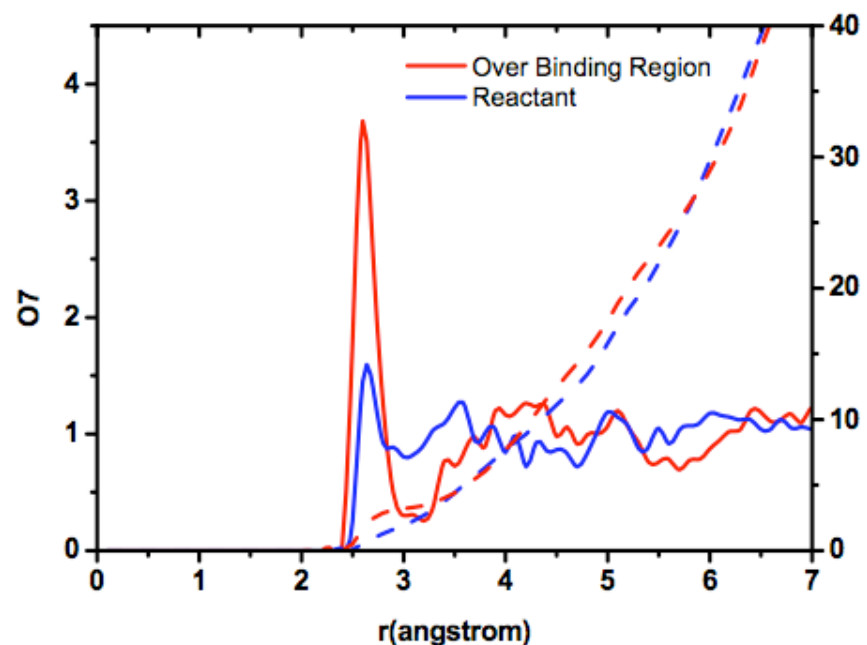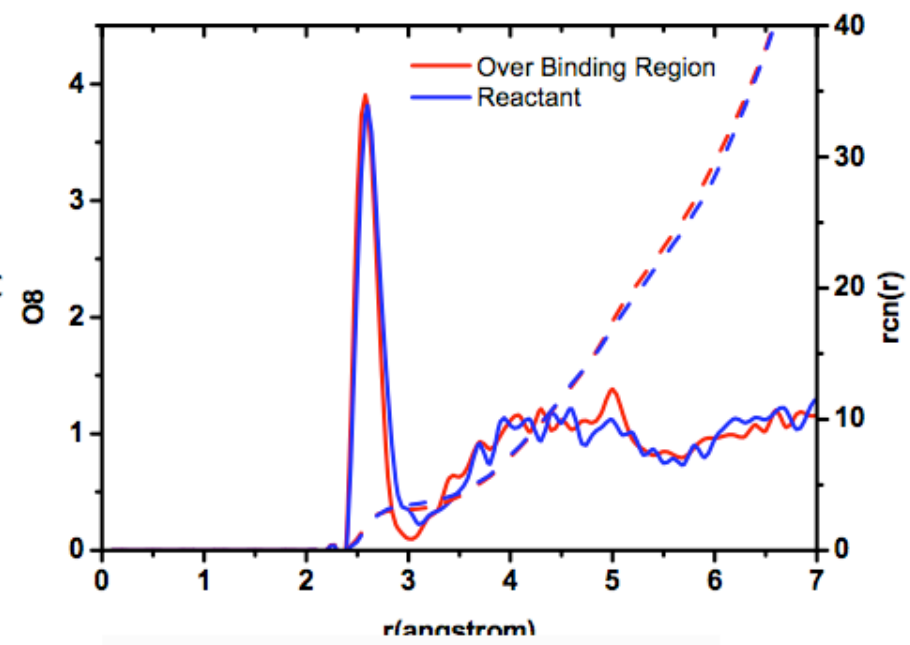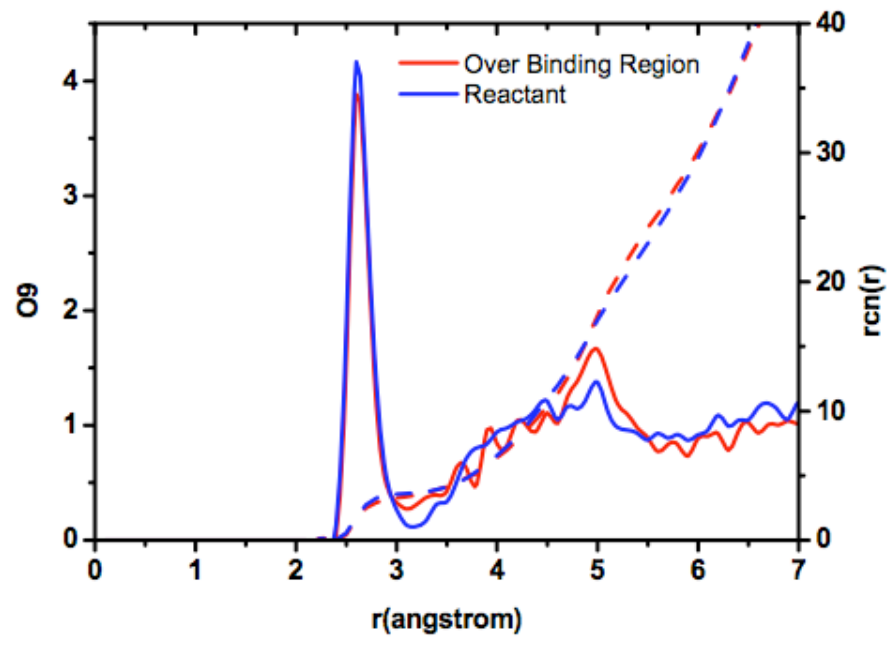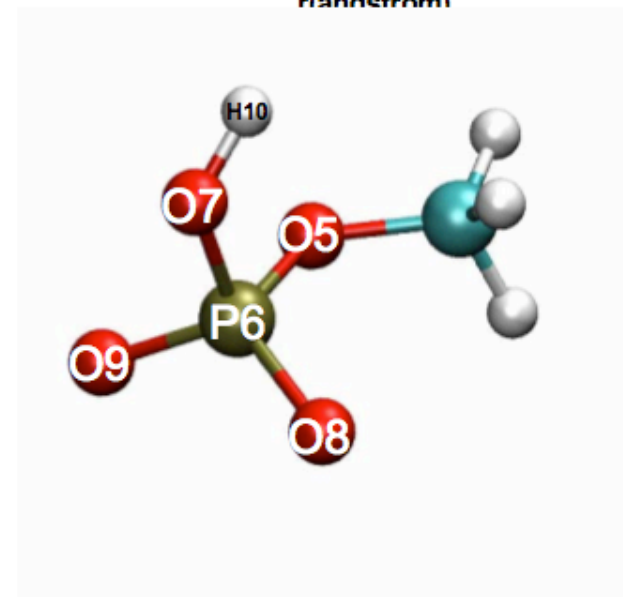

Fig. S10
